# Supplementary material
Source: MDPI journal article supplement (https://www.mdpi.com/2073-4441/10/1/16)
Supplement: s1 [file s1]

# Variability and Trend Detection in the Sediment Load of the Upper Indus River

Sardar Ateeq-Ur-Rehman <sup>1,\*</sup> , Minh Duc Bui <sup>1</sup>  and Peter Rutschmann <sup>1</sup> 

<sup>1</sup> Chair of Hydraulic and Water Resources Engineering, Arcisstr. 21, D-80333, Technical University of Munich; sardar.ateeq@tum.de (S.A.); bui@tum.de (M.D.B.); p.rutschmann@tum.de (P.R)

\* Correspondence: sardar.ateeq@tum.de; Tel.: +49-89-289-27161; Fax: +49-89-289-23172

Academic Editor: name

Version December 15, 2017 submitted to Water

## 1. Supplementary Material

**Table S1.** Statistical parameters of annual linear and quadratic trends of reconstructed SSLs and observed discharges for the Besham Qila and the Partab Bridge sites. Note:  $Q_s$  is annual SSL in Mt,  $Q$  is annual flow volume in BCM for Besham Qila ( $1969 \leq y \leq 2008$ ) and Partab Bridge ( $1962 \leq y \leq 2008$ ).

| Trend          | Besham Qila                               |        | Partab Bridge                            |        |
|----------------|-------------------------------------------|--------|------------------------------------------|--------|
|                | Equation                                  | $R^2$  | Equation                                 | $R^2$  |
| SSL linear     | $Q_s = -0.315097y + 786$                  | 0.0087 | $Q_s = 0.555835y - 932$                  | 0.0148 |
| SSL quadratic  | $Q_s = -0.029615y^2 + 117.465y - 116,312$ | 0.0169 | $Q_s = 0.131748y^2 - 522.485y + 518,161$ | 0.1368 |
| Flow linear    | $Q = 0.075016y - 72$                      | 0.0082 | $Q = 0.155112y - 251$                    | 0.0863 |
| Flow quadratic | $Q = -0.006747y^2 + 26.908y - 26,750$     | 0.0153 | $Q = 0.002850y^2 - 11.158y + 10,976$     | 0.0906 |

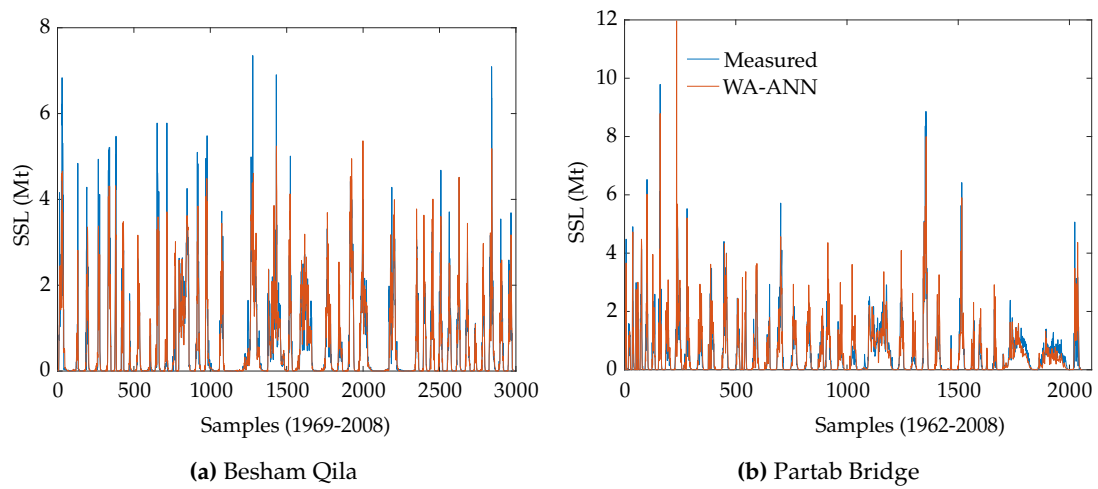

**Figure S1.** Comparison between the mass of suspended sediment sampled daily and computed results using WA-ANN models., (legends for (S1b) also apply for (S1a)).

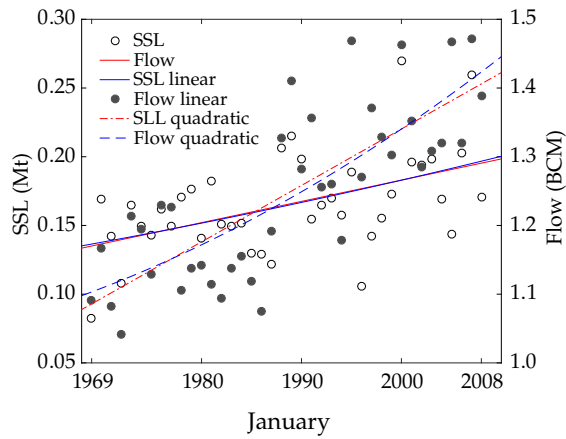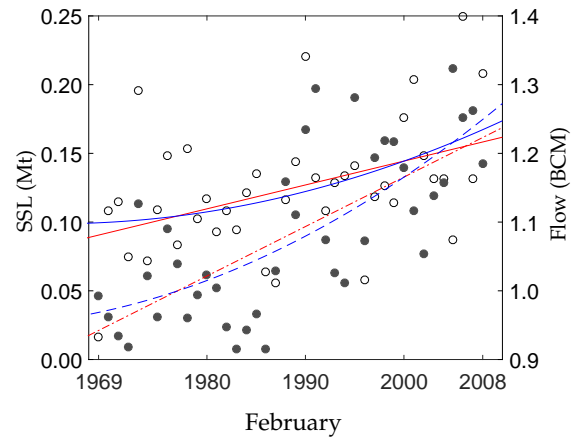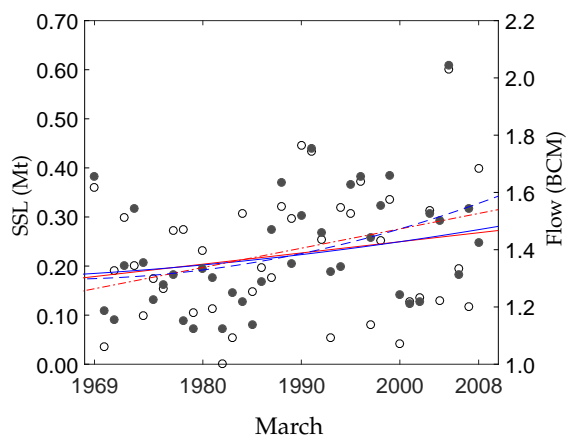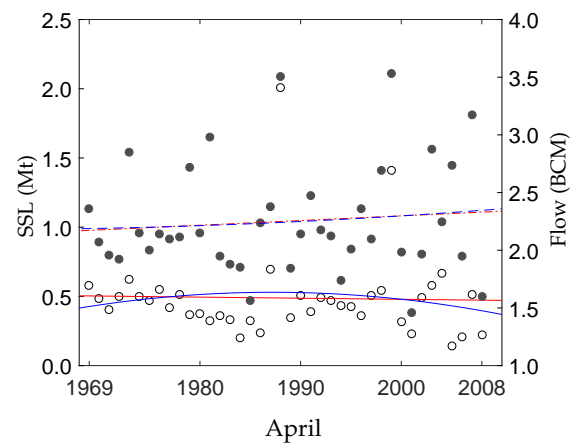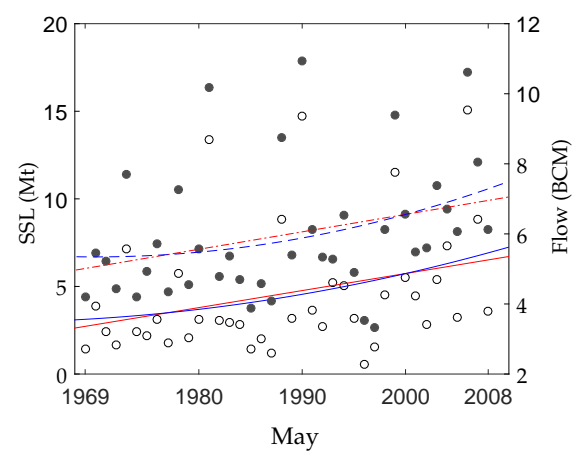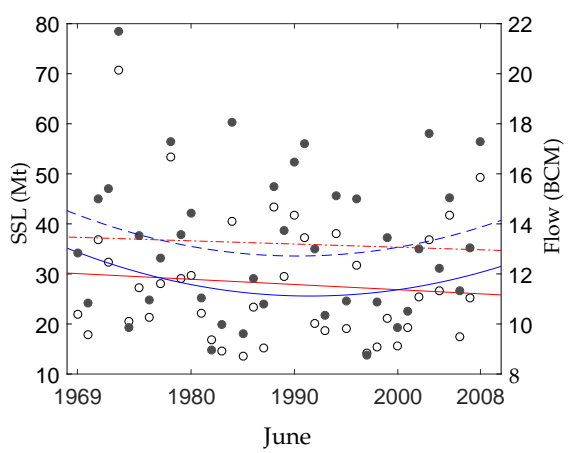

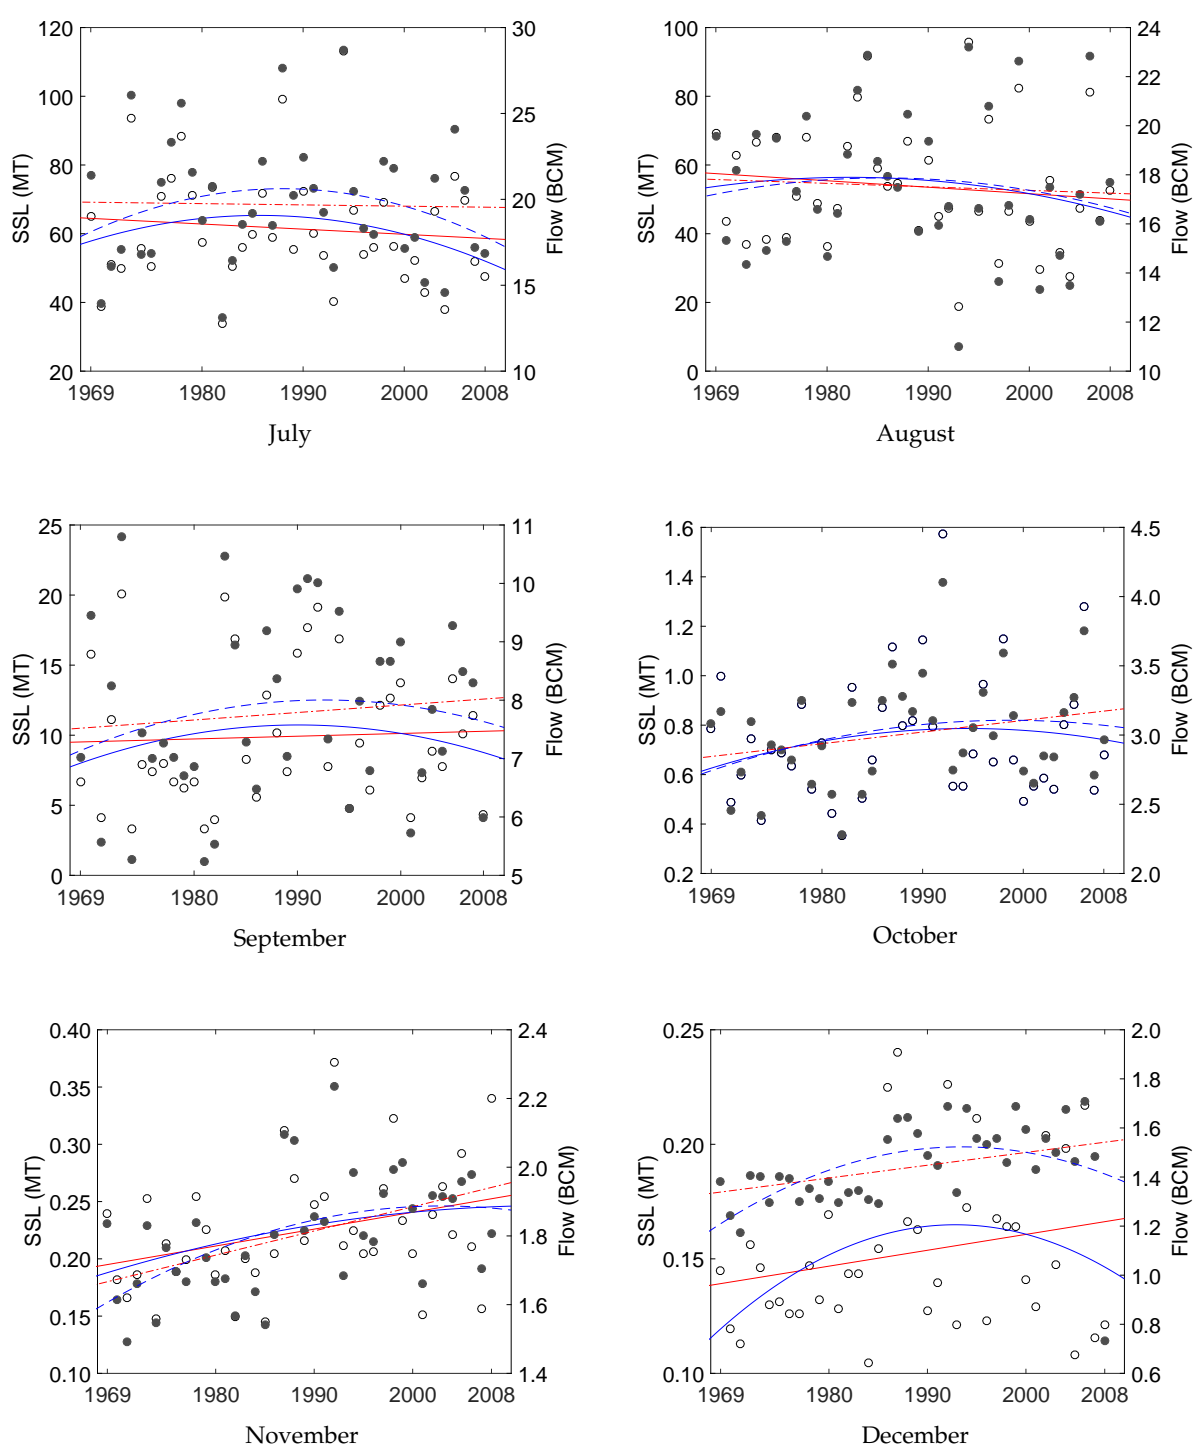

**Figure S2.** Mean monthly linear and quadratic trends in SSLs and discharges at Besham Qila site from 1969-2008.

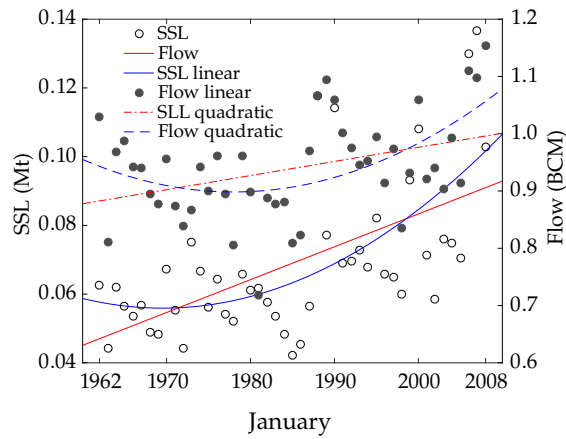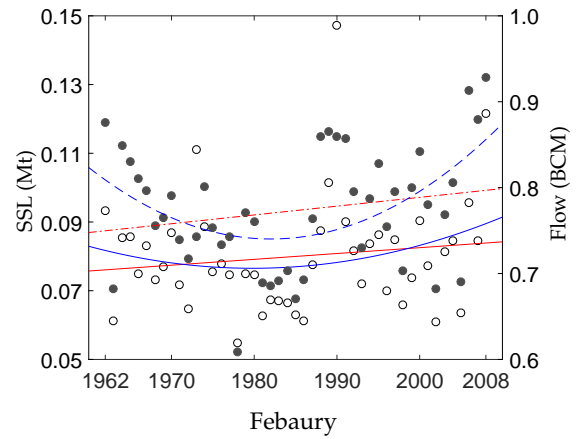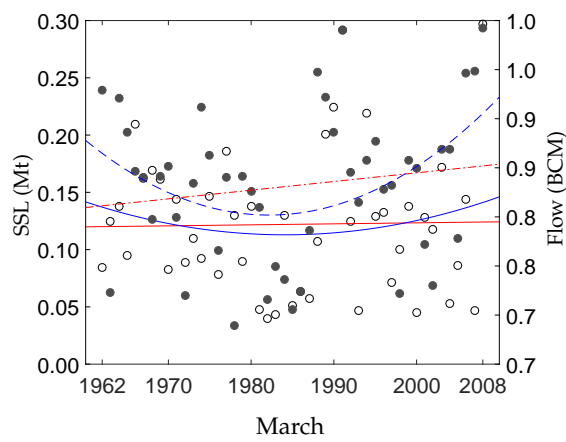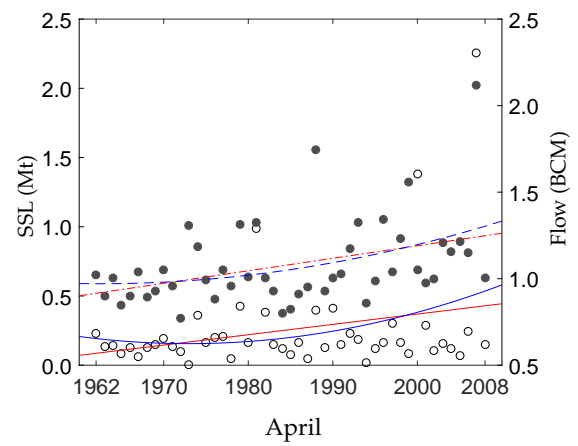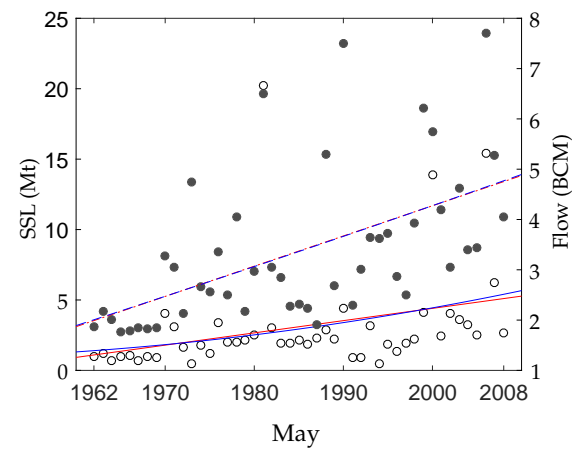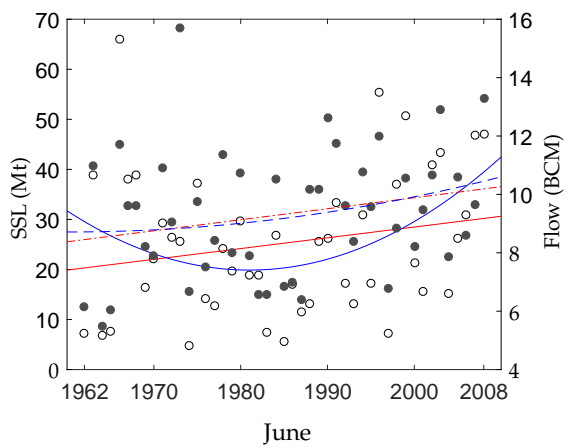

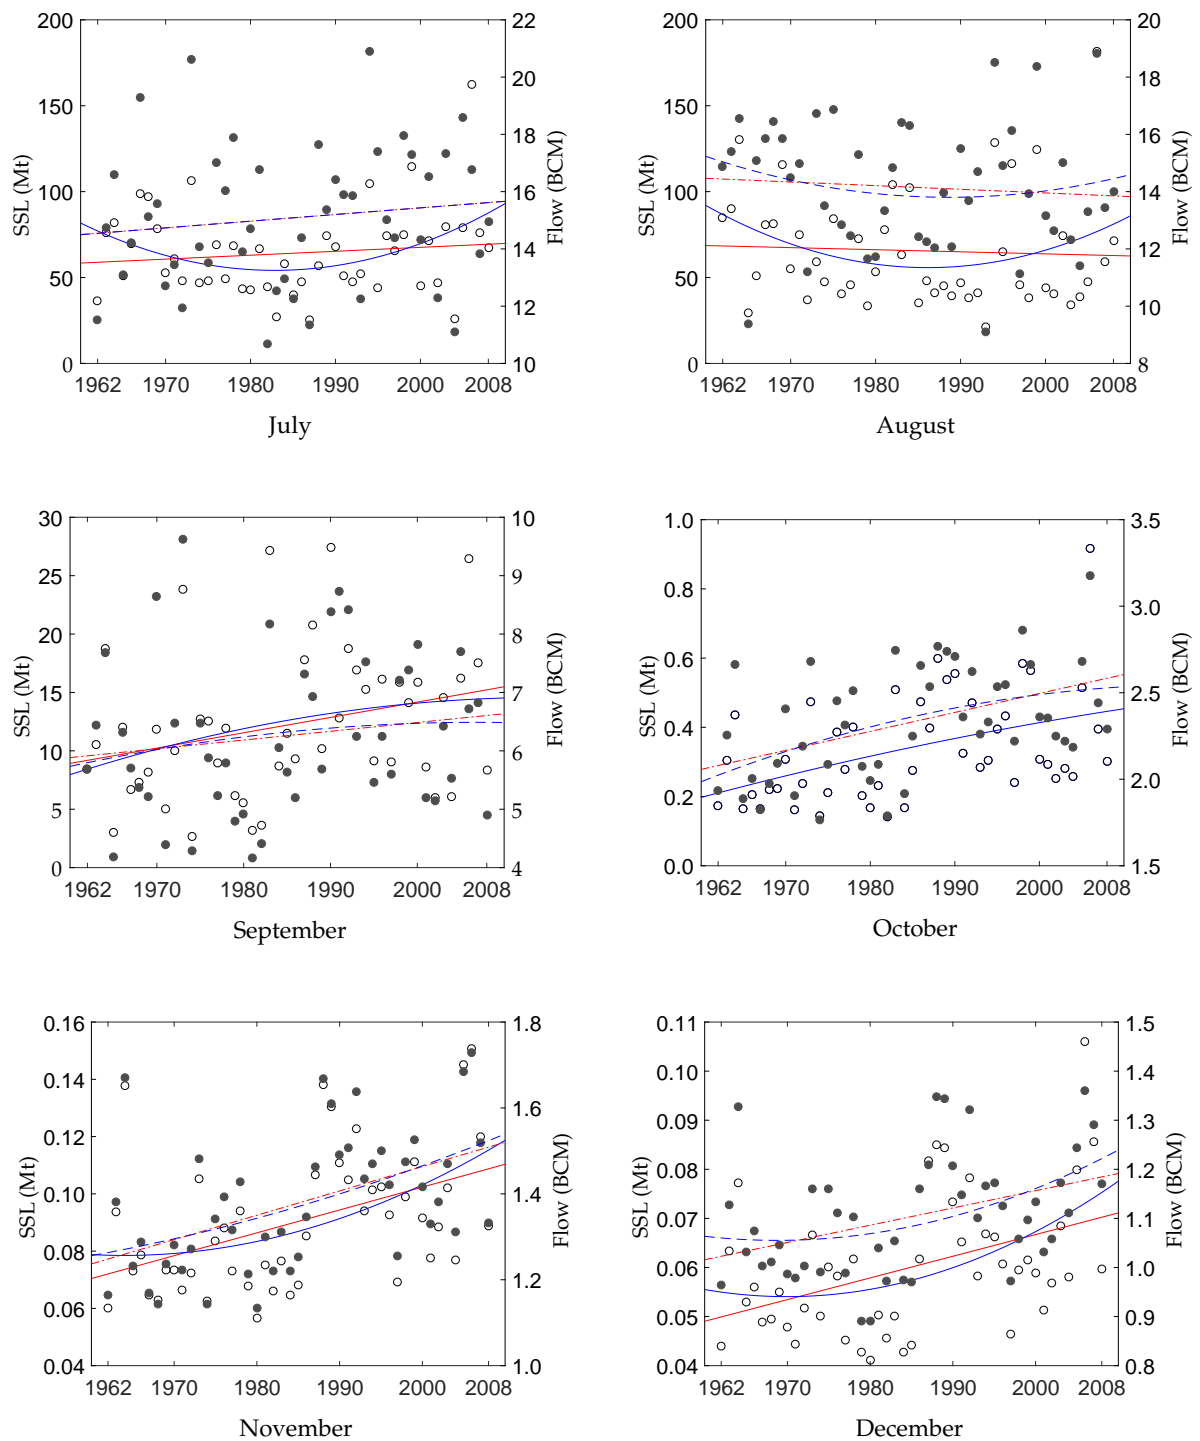

**Figure S3.** Mean monthly linear and quadratic trends in SSLs and discharges at Partab Bridge site from 1962-2008.
